# Supplementary material for: Integrated Analysis of the lncRNA/circRNA-miRNA-mRNA Expression Profiles Reveals Novel Insights Into Potential Mechanisms in Response to Root-knot Nematodes in Peanut
Source: Research Square preprint supplement (doi:10.21203/rs.3.rs-968829/v1), 2021-11-08
Supplement: Supplementary file 1 [file 1ba4ce8ea0ef818223a358e4.xlsx]

## Sheet: Sheet2
Title: Integrated analysis of the lncRNA/circRNA-miRNA-mRNA expression profiles reveals novel insights into potential mechanisms in response to root-knot nematodes in peanut
Supplemantary Table 2. The differential expression miRNAs between infected and no-infected peanut.
Index	miR_name	Infected peanut				No-infected peanut			fold_change(A(mean)/B(mean))	log2(fold_change)	pvalue(t_test)	miR_seq	Regulation
		A1(norm)	A2(norm)	A3(norm)		B/B1(norm)	B/B2(norm)	B/B3(norm)
1	gma-MIR482c-p5_2ss12GA19CT	16.7948	18.5177	19.72		6.54339	4.06172	6.42892	3.23074	1.69186	0.000421711	TTCCCAATTCCACCCATTT	up	19	18
2	mtr-miR319a-3p_R+1	24.2591	29.9811	27.2324		5.60862	11.0774	10.2863	3.0206	1.59483	0.0015767	TTGGACTGAAGGGAGCTCCCA	up	21	25
3	csi-miR166c-5p_L-1R+1_1ss8TC	4.97622	5.73167	5.16476		0	0	0	inf	inf	0.00183592	GGAATGCTGTCTGGTTCGAGA	up	21	21.75
4	ptc-miR319a	1868.78	2351.38	2082.73		376.712	636.46	536.6	4.06698	2.02396	0.00191093	TTGGACTGAAGGGAGCTCCC	up	20
5	mtr-miR319a-3p	1868.78	2351.38	2082.73		376.712	636.46	536.6	4.06698	2.02396	0.00191093	TTGGACTGAAGGGAGCTCCC	up	20
6	gma-miR319a	1868.78	2351.38	2082.73		376.712	636.46	536.6	4.06698	2.02396	0.00191093	TTGGACTGAAGGGAGCTCCC	up	20
7	PC-3p-91025_17	6.22028	5.29078	5.63429		0	0	0	inf	inf	0.00224671	GAACCAGATCGATTAATAAAC	up	21
8	ptc-miR393a-3p	14.9287	14.5496	14.5552		6.07601	6.27721	4.50024	2.61273	1.38556	0.00265385	ATCATGCTATCCCTTTGGATT	up	21
9	mtr-miR172b	211.489	193.995	105.643		623.024	527.285	695.609	0.276896	-1.85258	0.00273055	AGAATCTTGATGATGCTGCAT	down	21
10	PC-3p-70240_26	0	0	0		3.73908	4.06172	4.50024	-inf	-inf	0.00288133	CAATAGTTGATTTTGTGCCTC	down	21
11	vvi-MIR3630-p5_2ss19AG20CT_1	111.965	99.643	74.6543		193.03	208.994	211.511	0.466578	-1.09981	0.00297333	TGGGAATCTCTCTGATGCGT	down	20
12	vvi-MIR3630-p5_2ss19AG20CT_2	111.965	99.643	74.6543		193.03	208.994	211.511	0.466578	-1.09981	0.00297333	TGGGAATCTCTCTGATGCGTA	down	21
13	PC-5p-72212_25	0	0	2.81714		14.9563	11.0774	10.9292	0.0762154	-3.71377	0.00312375	AATTCAGGTGTAGTTGACTTCACG	down	24
14	ptc-MIR156b-p3_1ss14TC	197.805	153.433	189.688		92.5423	59.0796	60.4318	2.55089	1.351	0.00384868	TGCTCACTCTCTACCTGTCACC	up	22
15	ahy-miR3514-3p	8608.87	7365.64	7807.25		10224.5	11194.1	10939.4	0.734956	-0.444271	0.00416722	TCACCGTTAATACAGAATCCTT	down	22
16	PC-5p-16986_163	16.1727	14.9905	14.0857		40.1951	36.1863	33.4304	0.41206	-1.27908	0.00483293	TGTGAAGTTGATAGCCGAGAG	down	21
17	lja-miR1511-3p_R-3_1ss1AG	11.8185	9.69976	10.7991		6.07601	4.43097	3.21446	2.35524	1.23588	0.00500503	GACCAGGCTCTGATACCATGA	up	21
18	aly-miR164a-3p_2ss5TC6AG	8.70839	12.3451	12.6771		0	1.84624	0	18.27	4.1914	0.00553655	CACGCGCTCCCCTTCTCCAAC	up	21
19	ahy-MIR3508-p5	0	0	0		3.73908	4.43097	5.14313	-inf	-inf	0.00823949	TCTATTCTCTCTTCTGCACTGCC	down	23
20	PC-3p-76216_23	8.70839	7.05437	4.69524		13.0868	16.9854	14.1436	0.462685	-1.1119	0.00858713	CAGCTTGTAGTCCTTTATCCA	down	21
21	bna-miR166a_L+2	203.403	248.667	258.238		152.056	104.128	88.7191	2.05944	1.04225	0.00909743	AATCGGACCAGGCTTCATTCCCC	up	23
22	gma-MIR319k-p3_1ss18GA	51.0063	72.3073	61.0381		0	0	0	inf	inf	0.00987605	TGTGAATGATGCAGGAGATA	up	20
23	mtr-miR166a_R+1	39.8098	34.8309	45.5438		9.81509	16.9854	23.1441	2.40636	1.26685	0.0101026	TCGGACCAGGCTTCATTCCCCA	up	22
24	PC-5p-7845_316	16.1727	20.7222	22.0676		32.2496	31.0168	27.6443	0.648577	-0.624651	0.0106121	TCTGACTATTTAATTAACTGG	down	21
25	PC-3p-92774_17	0	0	0		2.80431	2.21549	3.21446	-inf	-inf	0.0109732	ATCTAATGACTCTTAACTATCAAC	down	24
26	PC-5p-93549_17	0	0	0		5.60862	4.43097	6.42892	-inf	-inf	0.0109732	AAAAGGTGGAAACTCAGGTGCAGT	down	24
27	PC-3p-118547_11	0	0	0		2.80431	2.21549	3.21446	-inf	-inf	0.0109732	ATCTAACGGCTGTCAGGTATCAAC	down	24
28	PC-3p-92906_17	0	0	0		5.60862	4.43097	6.42892	-inf	-inf	0.0109732	ATCATTTAACGACTCTCAATTATC	down	24
29	PC-3p-79884_22	0	0	0		5.60862	8.12345	6.42892	-inf	-inf	0.0119229	TTTTGGCACAGGAACTAATCAGTC	down	24
30	ahy-MIR398-p5_1ss8CA	108.233	165.778	125.832		0	11.0774	0	36.0953	5.17374	0.0136443	GAGTGAAACTGAGAACACAAAG	up	22
31	PC-3p-53077_41	0	9.69976	5.63429		31.7822	31.0168	19.2868	0.186805	-2.42039	0.0138586	AGAGAGATGCATGCTTTGAAAGTT	down	24
32	PC-5p-55442_38	0	0	2.34762		3.73908	5.90796	5.78603	0.152116	-2.71675	0.0146518	AGGATAAAGTGTGATCTCTCACCC	down	24
33	gma-miR172g_R+1_1ss9AT	111.343	90.825	81.2277		179.009	152.499	139.508	0.60167	-0.732956	0.0148752	GCAGCACCTTCAAGATTCACA	down	21
34	PC-5p-16120_171	22.393	14.1087	14.0857		45.8037	34.7093	33.4304	0.44397	-1.17147	0.0148793	TGTGAAGATGATATTGCGAAC	down	21
35	PC-3p-42100_57	3.11014	0	3.28667		9.3477	7.7542	6.42892	0.271848	-1.87913	0.0152947	AAGATGGCGAAGGTCGTGGAG	down	21
36	gma-miR167c_R+1	17.4168	4.40898	6.57334		30.8474	35.817	35.3591	0.278358	-1.84498	0.0156945	TGAAGCTGCCAGCATGATCTGA	down	22
37	PC-5p-9462_272	32.3455	27.3357	30.5191		19.1628	19.2009	18.6439	1.58225	0.661978	0.0159251	ACAGAAGGAGAAGTGAGCACGCA	up	23
38	gma-miR1511_L+1R+1	39.1878	37.0354	25.3543		15.4237	11.0774	0	3.83295	1.93845	0.0165523	AAACCAGGCTCTGATACCATGA	up	22
39	ahy-miR167-5p_R+1	2741.9	1873.82	2042.43		8701.78	6780.86	6034.18	0.309439	-1.69227	0.0168187	TGAAGCTGCCAGCATGATCTTA	down	22
40	PC-5p-52425_42	0	0	5.63429		14.0216	8.86194	11.5721	0.163523	-2.61243	0.0177038	AGTTGAGAACTGTTAGATAATAGT	down	24
41	gma-MIR171m-p5_1ss4GA	3.73217	0	3.28667		9.3477	7.38495	9.00049	0.272755	-1.87432	0.0182396	TTGACGTGCCTCAATTTGAAG	down	21
42	PC-3p-23915_114	16.1727	21.604	13.1467		30.8474	45.4174	40.5022	0.436111	-1.19723	0.0184946	TTTAACTAGTGCGCATCTGTC	down	21
43	mtr-miR167b-5p_R+1_1ss2GA	2511.75	1687.32	1706.72		4026.99	3516.71	5020.34	0.470054	-1.0891	0.0189728	TAAAGCTGCCAGCATGATCTGA	down	22
44	PC-5p-53620_40	12.4406	16.7541	10.3295		0	0	0	inf	inf	0.0199778	TGCCCCTTTATCATTCTGTACAAA	up	24
45	PC-3p-50599_44	6.22028	0	0		14.0216	10.3389	12.8578	0.167129	-2.58096	0.0212571	AGAAATCGGACCCTCCAATTTGTG	down	24
46	gma-miR1511_R+1_1ss12GT	276.18	266.743	331.484		206.584	131.452	198.011	1.63121	0.705946	0.0233813	AACCAGGCTCTTATACCATGA	up	21
47	PC-3p-71170_26	4.3542	5.29078	7.51239		0	2.95398	0	5.80822	2.5381	0.0253616	TTGCCACGTCATTCACTCAGC	up	21
48	ahy-miR3508_R+2_1ss21AT	87.0839	54.6714	24.4153		201.91	307.214	361.305	0.190906	-2.38906	0.0254861	TAGAGGGTCCCCATGTTCTCTTT	down	23
49	gma-miR10420_L+1R-1	21.1489	19.3995	12.6771		30.38	32.863	30.2159	0.569508	-0.812213	0.0256824	ACCTGAACCATCATTTTTT	down	19
50	PC-3p-91720_17	0	0	0		6.54339	3.69248	6.42892	-inf	-inf	0.0270039	CAACTACCGGGAAGATTTTGG	down	21
51	gma-miR6300_L-1R+8	9.33042	24.2494	15.4943		41.5973	30.2783	34.0733	0.463187	-1.11033	0.0282795	TCGTTGTAGTATAGTGGTAAGTATT	down	25
52	PC-5p-79847_22	0	0	0		4.67385	2.58473	3.21446	-inf	-inf	0.0300052	ATTCAGGTGCAGTTGACTTTACGT	down	24
53	lja-miR1511-3p_R-6	272.448	232.794	236.64		187.889	129.975	185.153	1.47487	0.560584	0.0308177	AACCAGGCTCTGATACCA	up	18
54	PC-3p-41817_57	16.1727	15.4314	11.7381		9.81509	4.06172	3.21446	2.53593	1.34251	0.0308453	TTGGGAACCGAATTAGAATTT	up	21
55	mtr-MIR166g-p3_1ss20CT	399.342	401.658	400.504		247.247	254.781	319.517	1.46249	0.54843	0.0311777	TCTCGGACCAGGCTTCATTT	up	20
56	mtr-miR160a	1062.42	902.739	1155.26		790.115	545.748	754.755	1.49259	0.577814	0.0318428	TGCCTGGCTCCCTGTATGCCA	up	21
57	gma-miR160a-5p	1062.42	902.739	1155.26		790.115	545.748	754.755	1.49259	0.577814	0.0318428	TGCCTGGCTCCCTGTATGCCA	up	21
58	stu-miR160a-5p	1062.42	902.739	1155.26		790.115	545.748	754.755	1.49259	0.577814	0.0318428	TGCCTGGCTCCCTGTATGCCA	up	21
59	sly-miR167b-3p	77.1315	65.2529	63.3857		45.8037	51.6947	53.36	1.36399	0.447838	0.0321188	AGGTCATCTAGCAGCTTCAAT	up	21
60	PC-3p-66636_29	0	4.40898	0		9.3477	6.64646	6.42892	0.196627	-2.34647	0.0338868	TACTCTGGAGACGATGATAATGGT	down	24
61	ahy-miR3508	14397.5	6221.07	3249.11		23876.8	41082.1	47053.9	0.213079	-2.23054	0.0341869	TAGAGGGTCCCCATGTTCTCA	down	21
62	PC-5p-25433_106	12.4406	7.05437	14.0857		19.6302	21.4164	29.573	0.475515	-1.07244	0.0350896	TGCGAGAGTTGTATTTGTATC	down	21
63	pvu-miR159a.2_2ss12GC13GA	595.281	548.918	708.042		467.853	362.97	457.739	1.43745	0.52351	0.0366498	CTTCCATATCTCAGGAGCTTC	up	21
64	mes-MIR159a-p5_1ss4GC	595.281	548.918	708.042		467.853	362.97	457.739	1.43745	0.52351	0.0366498	CTTCCATATCTCAGGAGCTTC	up	21
65	PC-5p-101957_14	0	0	0		3.2717	2.21549	4.50024	-inf	-inf	0.0371467	AGTTGATACTGAGAACCATTAGAT	down	24
66	mtr-MIR2199-p3_1ss19TA	10.5745	11.9042	11.2686		9.3477	7.38495	6.42892	1.45704	0.543039	0.0379818	ATCCGTTCTAGTGTATCAAAC	up	21
67	PC-3p-27240_98	32.3455	15.8723	36.6229		64.4992	49.4792	47.574	0.525159	-0.929174	0.0380722	AGGACTAAATTGAGGCTCGAGTGT	down	24
68	mdm-miR477b_R-1_2ss1AT20GC	0	0	0		6.54339	8.12345	3.85735	-inf	-inf	0.0383453	TCTCTCCCTCAAGGGCTTCCA	down	21
69	PC-3p-14080_193	38.5657	29.9811	22.5372		43.9342	50.9562	63.0034	0.576869	-0.793685	0.038759	TGAAATCGACTGCACTGAGT	down	20
70	PC-3p-30685_85	16.1727	33.5083	31.9276		0	0	0	inf	inf	0.0389805	AATAAGAATAATCAATTCCA	up	20
71	PC-5p-64545_30	0	0	2.34762		4.67385	2.58473	5.14313	0.189298	-2.40127	0.0391275	ACGTGAAGTTAATACTTGAGAGCC	down	24
72	PC-5p-30813_85	0	15.8723	17.8419		30.8474	39.1402	30.8588	0.334313	-1.58073	0.0398404	AATTCAGATATAGTTAACTTCATG	down	24
73	gma-miR160a-3p	165.459	113.752	116.442		71.0425	67.5723	50.1456	2.09606	1.06768	0.0407523	GCGTATGAGGAGCCAAGCATA	up	21
74	stu-miR160a-3p	165.459	113.752	116.442		71.0425	67.5723	50.1456	2.09606	1.06768	0.0407523	GCGTATGAGGAGCCAAGCATA	up	21
75	PC-5p-77629_23	0	0	0		2.33693	3.69248	5.14313	-inf	-inf	0.0442173	AAATTCAGGTACAGTTAACTTCAT	down	24
76	ptc-MIR166n-p5_2ss16AG18GA	199.049	187.823	184.053		143.02	125.544	84.8617	1.6154	0.691894	0.0444648	AATGAAGTTTGATCCGAAATC	up	21
77	gma-miR482b-3p	77298.2	67022.7	59880.3		41648.7	57600.4	45034.6	1.41528	0.501083	0.0464727	TCTTCCCTACACCTCCCATACC	up	22
78	PC-3p-275_4753	863.375	1082.85	1372.89		1602.2	1731.03	1753.81	0.652464	-0.61603	0.0465302	TGTGTGTGTTTCTGGTCTCCA	down	21
79	lja-miR1511-3p_R-3_1ss19TC	5.59825	3.52718	7.98191		0	0	0	inf	inf	0.0473502	AACCAGGCTCTGATACCACGA	up	21
80	PC-5p-184891_6	0	0	0		4.67385	3.69248	7.7147	-inf	-inf	0.0474215	TTGGTAAAGTGAGAAAATGAA	down	21
